# Supplementary material for: Glycosyltransferase Family 43 Is Also Found in Early Eukaryotes and Has Three Subfamilies in Charophycean Green Algae
Source: PLoS One. 2015 May 29;10(5):e0128409. doi: 10.1371/journal.pone.0128409 (PMC4449007; doi:10.1371/journal.pone.0128409)
Supplement: S5 Table — (XLSX) [file pone.0128409.s008.xlsx]

## Sheet: Sheet1
Table S5: GT43 genes in seven land plants
* Bold and italic are the longest or the lowest group in that species
Plant class	Species		Count	Average length*	Average GC*	Average # of coding exons
Dicot	Arabidopsis thaliana	Total	4	1296.6	44.79	3
		A1 (AtIRX9L)	1	1185	46.41	3
		A3 (AtIRX9)	1	1056	41.09	3
		B (AtIRX14)	2	1528.5	45	3
	Populus trichocarpa	Total	7	1183.5	44.37	3
		A1	1	1188	45.11	3
		A2	2	997.5	44.19	3
		A3	2	1077	42.01	3
		B	2	1522.5	46.4	3
Monocot	Oryza sativa	Total	10	1260.86	57.44	3.2
		A1	2	1101	61.56	3
		A2	2	1348.5	47.06	3
		A3	4	1257.75	62.34	3.5
		B	2	1458	65.5	3
	Panicum virgatum	Total	19	1087.43	62.45	2.53
		A1	3	1102	63.51	3
		A2	4	1347.75	47.45	3
		A3	8	795	67.66	2
		B	4	1405.5	67.06	2.75
Gymnosperm	Picea abies	Total	4	1053.25	44.44	3.5
		A	2	1176	42.7	5
		B	2	930.5	46.19	2
Moss	Physcomitrella patens	Total	5	1375.8	49.77	4
		A	2	1288.5	51.08	4
		B	3	1434	48.9	4
Spike moss	Selaginella moellendorffii	Total	3	1206	55.66	3.33
		A	1	783	54.15	3
		B	2	1417.5	56.42	3.5
